# Supplementary material for: Adenotonsillar pathology in mucopolysaccharidoses – lysosomal storage predominates in paracortical CD63+ cells
Source: PubMed Central journal article supplement — Virchows Arch. 2023 Oct 3;484(1):135–40. doi: 10.1007/s00428-023-03662-y (PMC11330409; doi:10.1007/s00428-023-03662-y), 2023-10-03

**Table S1**

List of primary and secondary antibodies

| Antigen [Antibody clone]               | Provider                                                        | IHC dilution | IF dilution |
|----------------------------------------|-----------------------------------------------------------------|--------------|-------------|
| PRIMARY ANTIBODIES                     |                                                                 |              |             |
| CD3                                    | Novocastra, Newcastle upon Tyne, United Kingdom                 | 1:100        |             |
| CD20 [L26]                             | DAKO, Copenhagen, Denmark                                       | 1:1000       |             |
| CD31 [JC70A]                           | DAKO, Copenhagen, Denmark                                       | 1:50         |             |
| CD45RO [UCHL1]                         | DAKO, Copenhagen, Denmark                                       | 1:200        |             |
| CD63 [NK1/C3]                          | Abcam, Cambridge, United Kingdom                                | 1:100        | 1:50        |
| CD68 [PGM1]                            | DAKO, Copenhagen, Denmark                                       | 1:200        |             |
| LAMP1 [rabbit polyclonal]              | kindly provided by Dr. S. Carlsson (University of Umea, Sweden) | 1:10000      |             |
| Vimentin [V9]                          | BioGenex, Fremont, CA, USA                                      | 1:400        |             |
| S100 protein [rabbit polyclonal]       | DAKO, Copenhagen, Denmark                                       | 1:10000      |             |
| CD1a [rabbit monoclonal, EP3622]       | ZYTOMED, Berlin, Germany                                        | 1:500        |             |
| Langerin [rabbit monoclonal, EPR15863] | Abcam, Cambridge, United Kingdom                                | 1:200        |             |
| smooth muscle (sm) actin [1A4]         | DAKO, Copenhagen, Denmark                                       | 1:200        |             |
| Desmin [D33]                           | DAKO, Copenhagen, Denmark                                       | 1:200        |             |
| LAMP2 [goat polyclonal]                | R&D Systems, Minneapolis, MN, USA                               |              | 1:50        |
| CD68 [rabbit monoclonal, EPR20545]     | Abcam, Cambridge, United Kingdom                                |              | 1:1000      |
| SECONDARY ANTIBODIES                   |                                                                 |              |             |
| [Donkey] anti-Goat AF568 IgG           | Invitrogen – Thermo Fisher Scientific (Carlsbad, CA, USA)       |              | 1:500       |
| [Donkey] anti-Mouse AF488 IgG          | Invitrogen – Thermo Fisher Scientific (Carlsbad, CA, USA)       |              | 1:500       |
| [Donkey] Anti-Rabbit AF555 IgG         | Invitrogen – Thermo Fisher Scientific (Carlsbad, CA, USA)       |              | 1:500       |
| [Donkey] Anti-Goat AF647 IgG           | Invitrogen – Thermo Fisher Scientific (Carlsbad, CA, USA)       |              | 1:500       |

## Fig. S1

### Adenotonsillar pathology in an untreated MPS I patient (#3)

(a) anti-CD3 and (b) anti-CD20 staining. (c, d) CD68<sup>+</sup> macrophages predominate in follicular germinal centers (outlined by dashed line). Image shown in d corresponds to the rectangle (in the paracortex) in c; (e, f) vacuolated CD63<sup>+</sup> cells populate paracortex. Image in f corresponds to the rectangle in e. a - f images originate from serial histological sections; (g) cytoplasm of follicular germinal center macrophages contains pleiomorphic vacuoles (black arrows); (h, i) paracortical cells contain partly cleared membrane-bound storage vacuoles with fine granular contents.

scale bars = 100  $\mu\text{m}$  (a, b, c, e); 2  $\mu\text{m}$  (g-i)

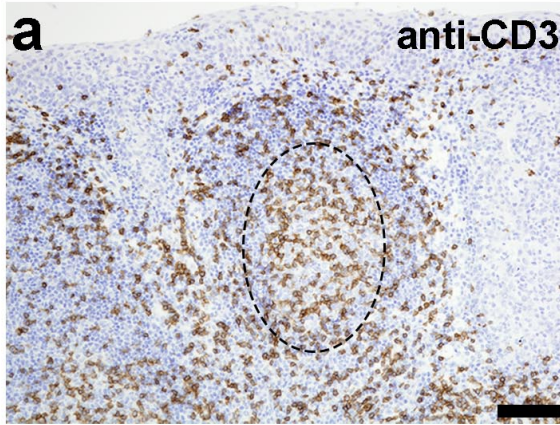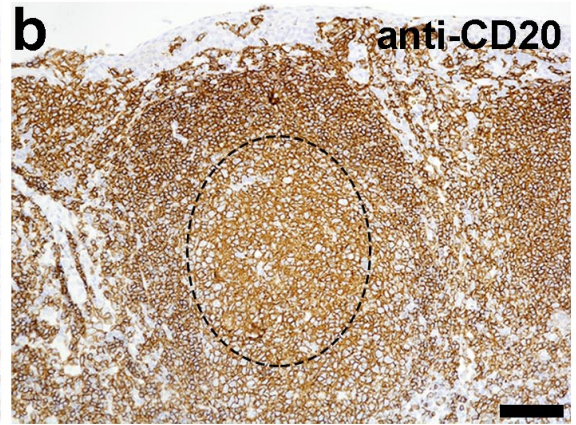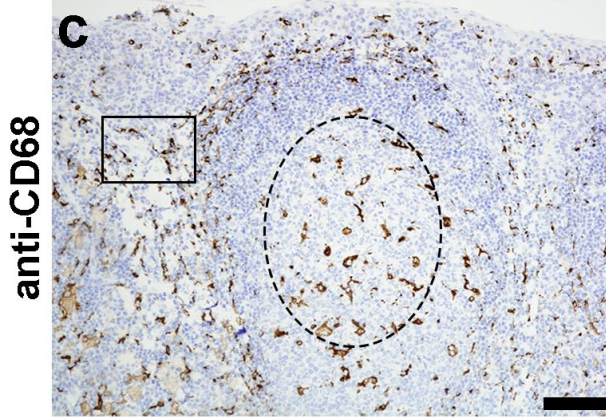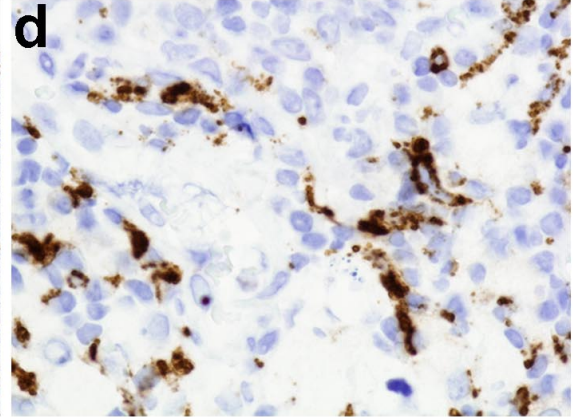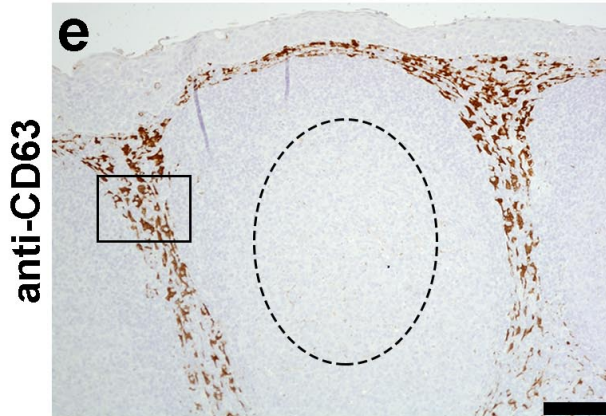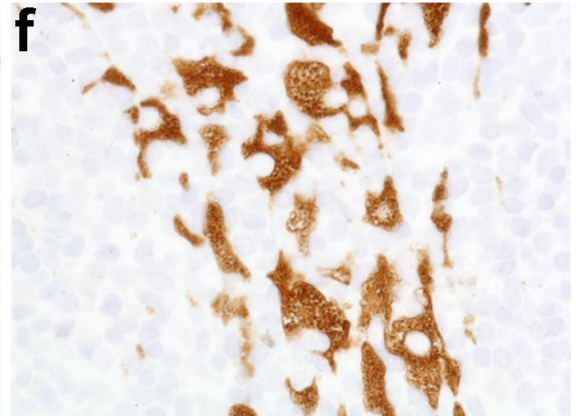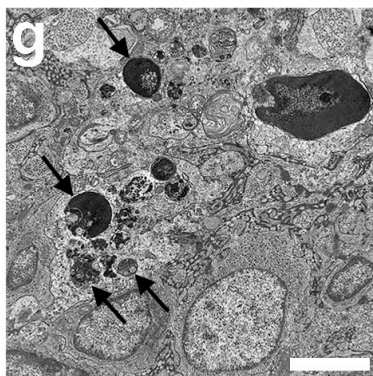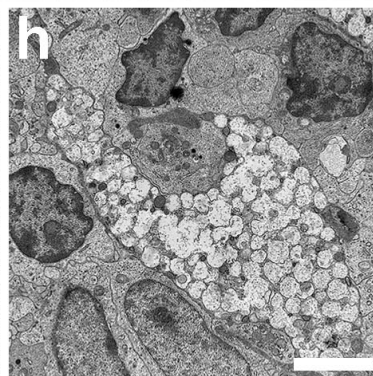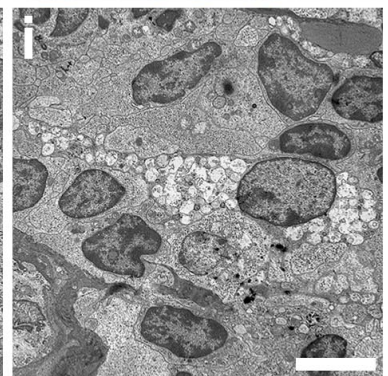

**Fig. S2**

**Comparison of IHC staining patterns of CD63 and CD68 with S-100, CD1a, Langerin, desmin, vimentin, and smooth muscle (sm) actin in an MPS II patient (#4).**

**(a)** anti-CD63, **(b)** anti-CD68, **(c)** anti-S100, **(d)** anti-CD1a, **(e)** anti-langerin, **(f)** anti-desmin, **(g)** anti-vimentin, and **(h)** anti-sm-actin. Images from serial sections are shown.

scale bars = 100  $\mu$ m (**a-d**); *representative images are shown*



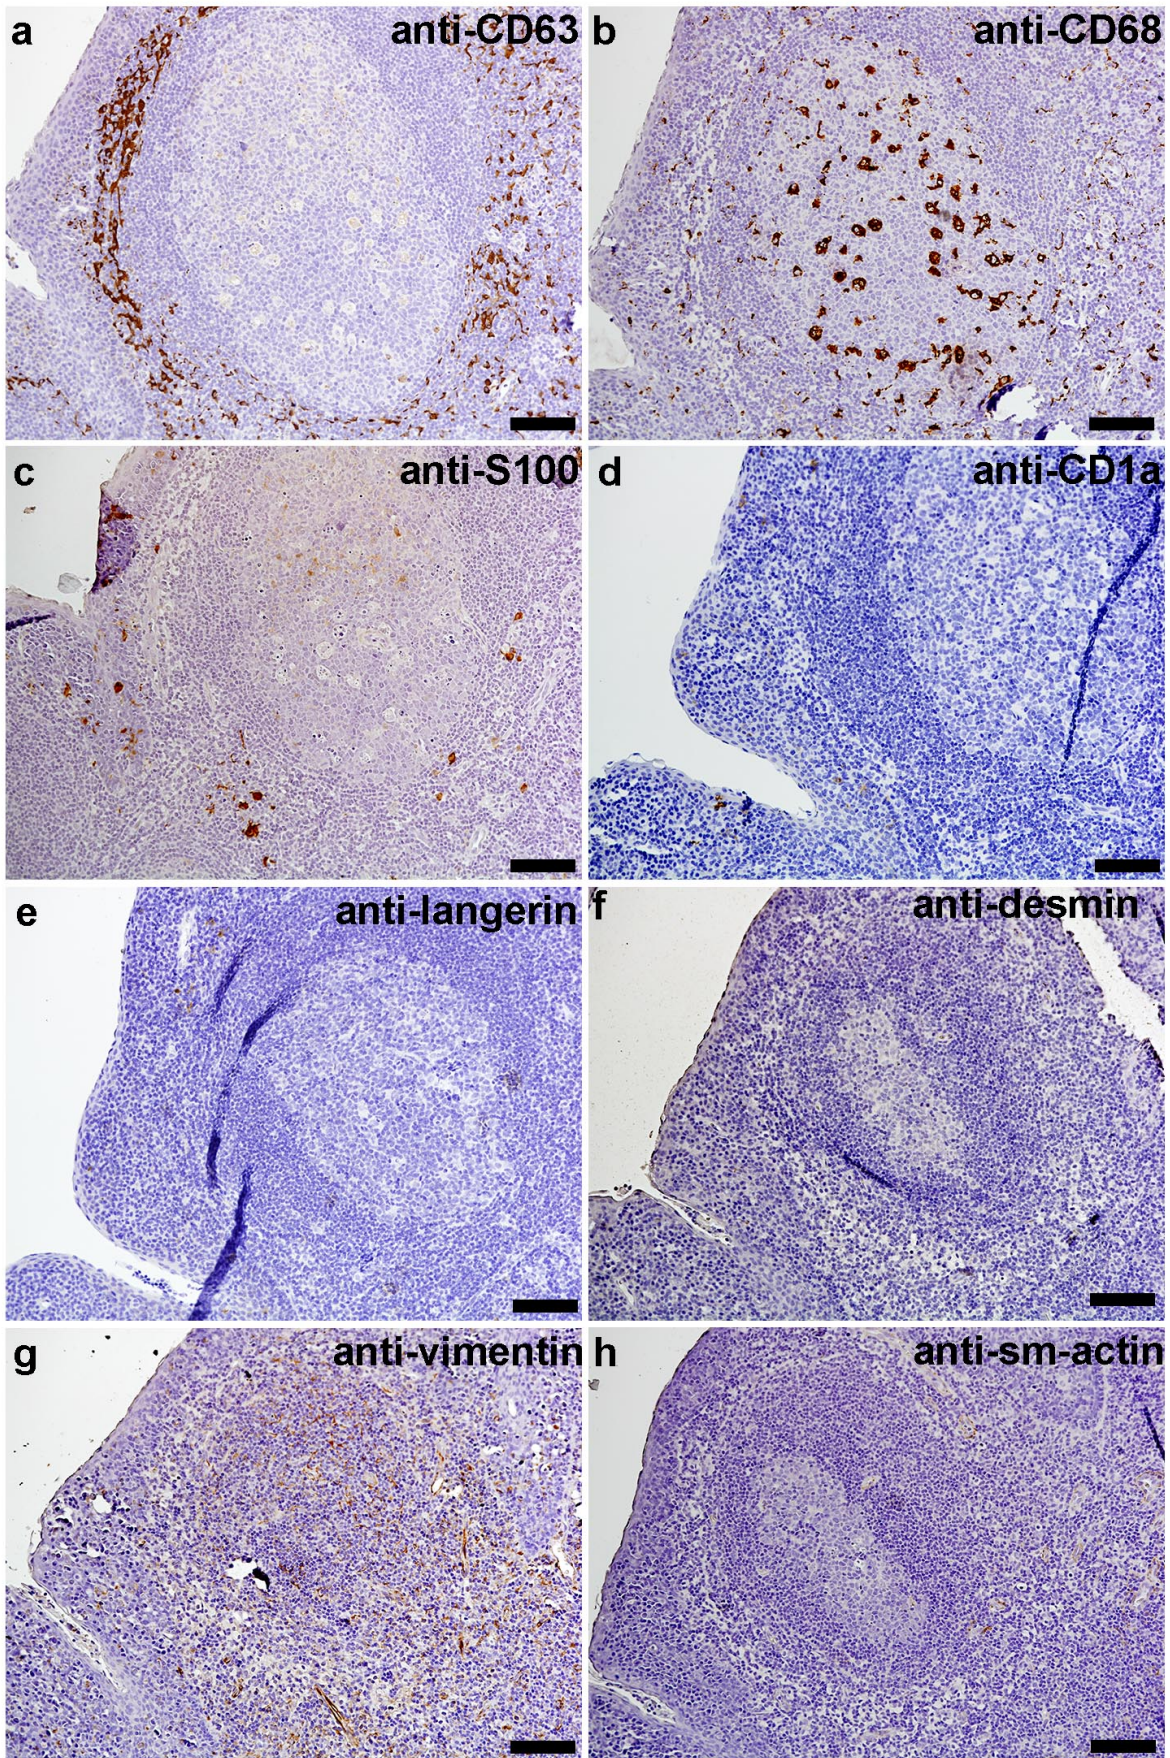



### **Fig. S3**

#### **Adenotonsillar findings in HSCT and ERT treated MPS I patients.**

Adenoidectomy was performed 4 years and 4 months after HSCT (patient #1) and 7 months after initiation of ERT (patient #2).

(**a-d**) the number of CD68<sup>+</sup> and CD63<sup>+</sup> cell is substantially lower compared to a patient who was not treated at the time of adenoidectomy (*Fig. S1*). Distribution of CD68<sup>+</sup> and CD63<sup>+</sup> cells is comparable to control tissues (*Fig. S3*). Dashed lines and black arrows highlight the germinal centers and epithelial surface, respectively. Images from serial sections are shown for both patients.

Nonspecific histopathological inflammatory changes were comparable to findings in non-MPS/non-LS controls.

scale bars = 100  $\mu$ m (**a-d**); *representative images are shown*

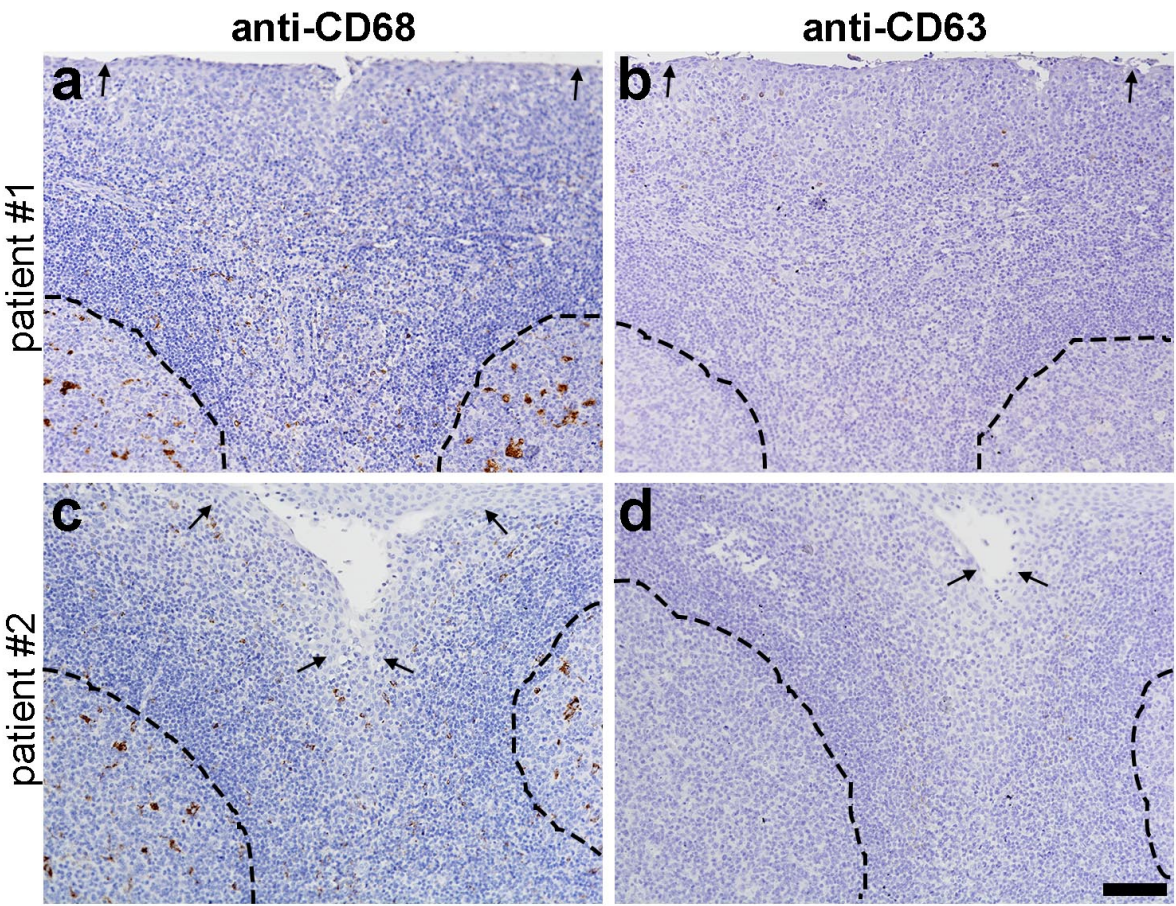

## Fig. S4

### CD68 and CD63 expression in non-MPS/non-LS adenotonsillar tissue.

Tissue samples from all non-MPS/non-LS controls shared similar nonspecific histopathological inflammatory changes corresponding to findings commonly associated with the clinical diagnosis of adenotonsillar hypertrophy. Lymphoid tissues were covered by locally eroded pseudostratified ciliary respiratory and/or squamous epithelium. Lymphoid germinal centers were hyperplastic and with abundant vacuolated histiocytes/macrophages. **(a, c, e)** CD68<sup>+</sup> cells are almost exclusively restricted to follicular germinal centers (outlined by dashed lines). **(b, d, f)** Paracortical areas do not contain CD63<sup>+</sup> cells. CD63<sup>+</sup> cells are seen scattered in the medullary sinuses/cords.

Black arrows **(a, c)** highlight epithelial surface. Areas outlined by the rectangles in **c** and **d** correspond to images shown as **e** and **f**, respectively. Images from serial histological sections are shown for both immunohistochemical stains.

scale bars = 100  $\mu\text{m}$  **(a, b, e, f)**; 200  $\mu\text{m}$  **(c, d)**; *representative images are shown*



anti-CD68

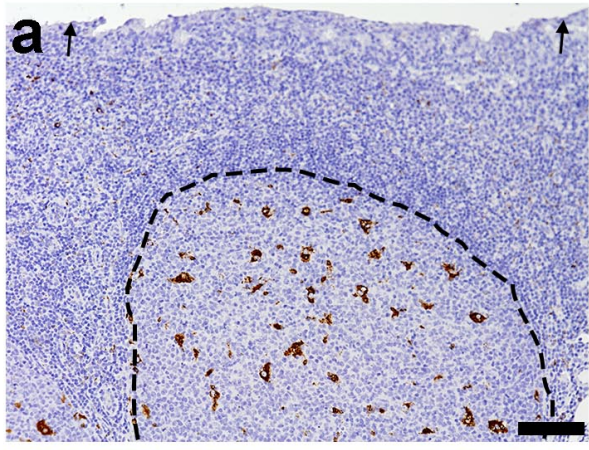

anti-CD63

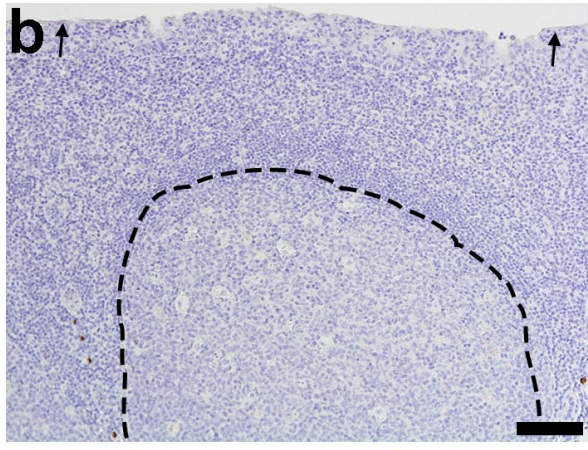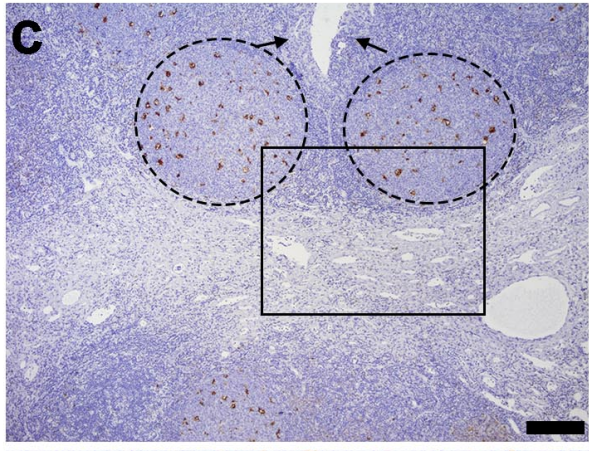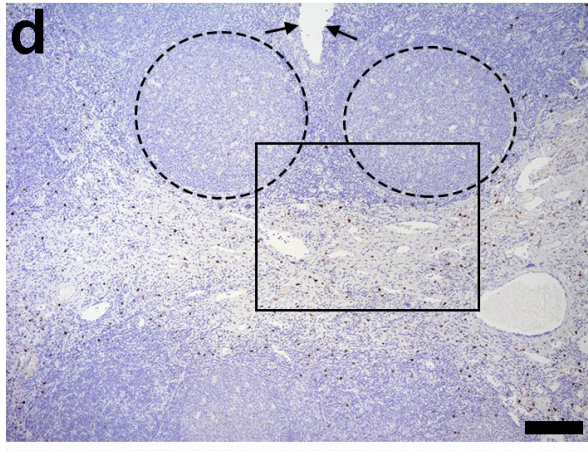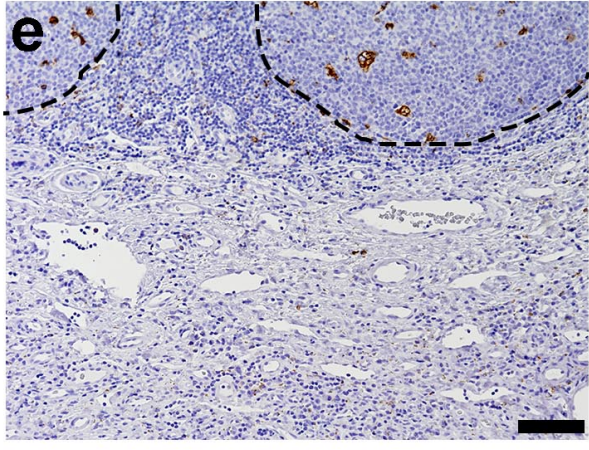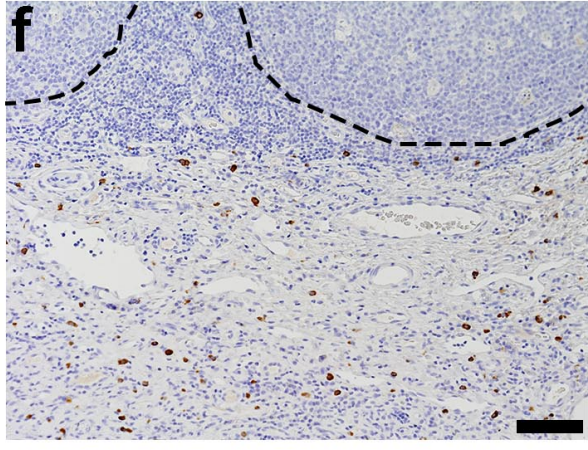

**Fig. S5**

**CD63 expression in storage lysosomes of non-lymphoid tissues in MPS patients.**

**(a-d)** MPS IIIA patient (*SGSH* (NM\_000199.5): c.[250-2A>G];[703G>A], p.[His84\_Gln85del];[Asp235Asn])

**(e)** MPS II patient (*IDS* (NM\_000202.8): c.[1212\_1215dup];[0], p.Leu406ValfsTer26)

**(f)** MPS VII patient (*Marek et al.* (2021) *Cardiovasc. Pathol.*)

**(a)** cerebellar cortex, Purkinje cells bodies (black arrows), storage lysosomes in Purkinje cells dendrites (white arrows) are CD63+; **(b)** brain stem neurons with CD63+ storage lysosomes; **(c)** CD63+ storage lysosomes in the chondrocytes of the tracheal cartilage; **(d)** valvular interstitial cells (VICs) of the aortic valve with CD63+ storage lysosomes; **(e)** CD63+ lysosomes in cortical neurons; **(f)** valvular interstitial cells (VICs) of the aortic valve with CD63+ storage lysosomes.

scale bars = 50  $\mu$ m



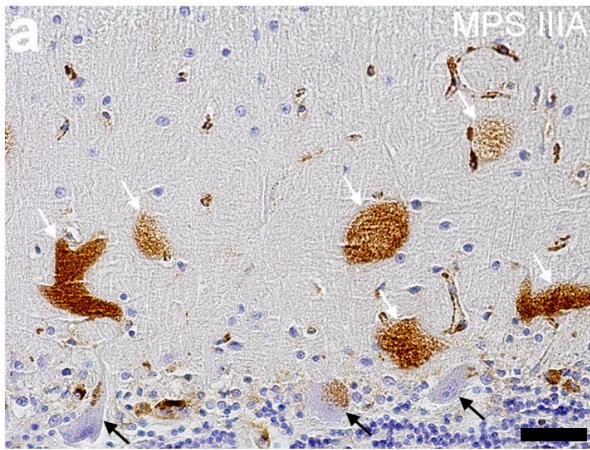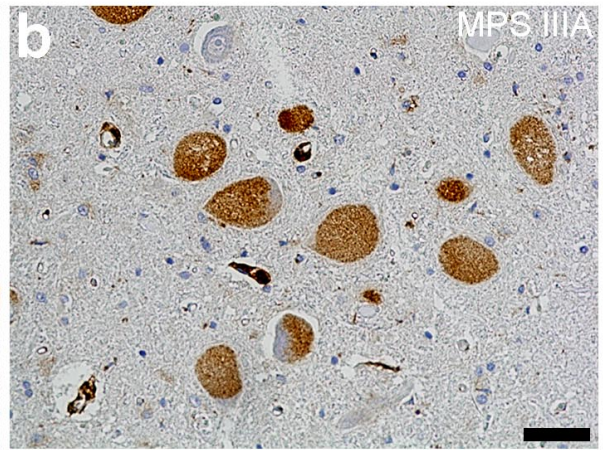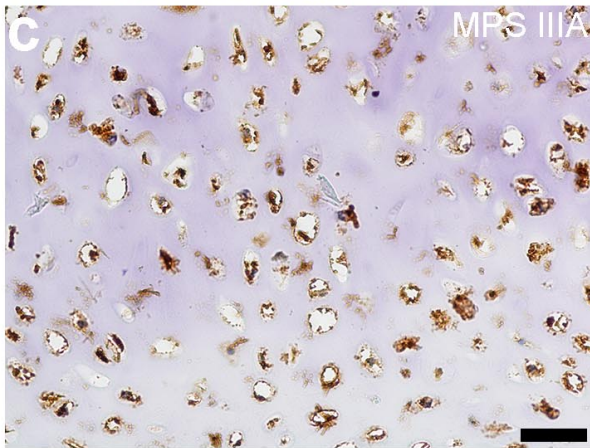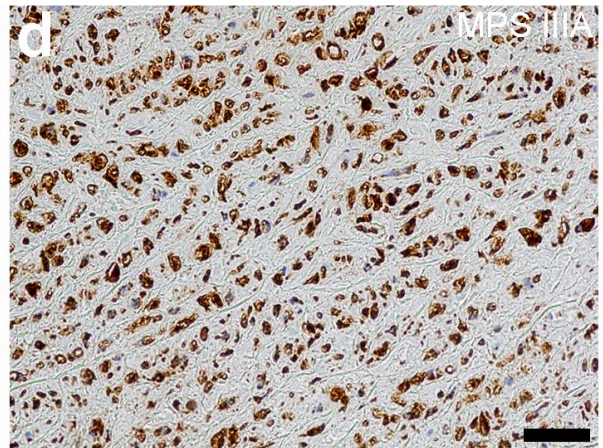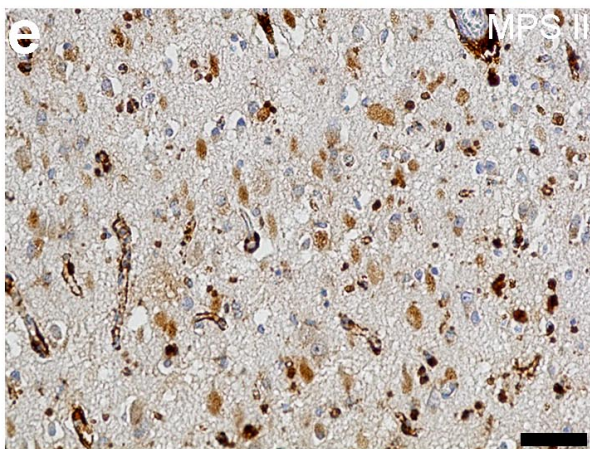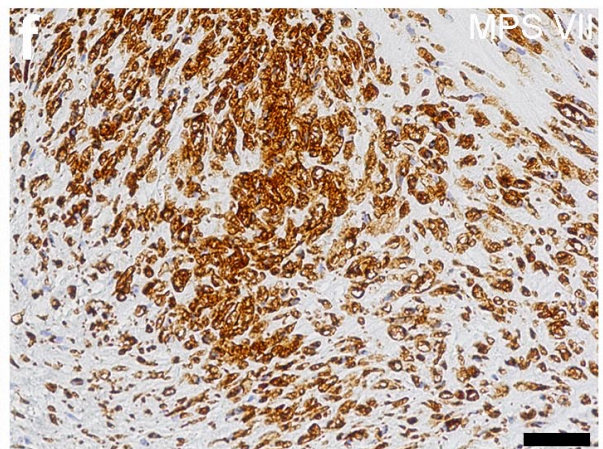



**Fig. S6**

**Adenotonsillar pathology in a patient with infantile neurovisceral variant of ASM deficiency.**

(**a, b**) CD68<sup>+</sup> cells cluster in the tissue and are not restricted to germinal centers (outlined by dashed lines) as in MPS patients. CD68<sup>+</sup> cells can be found in paracortical areas and sinuses. (**c, d**) CD63<sup>+</sup> cells are present in the paracortical areas in larger numbers than in control non-MPS tissues, but are not vacuolated. CD63 can also be detected in areas populated by clustered CD68<sup>+</sup> cells.

Areas outlined by the rectangles in **a** and **c** correspond to images shown as **b** and **d**, respectively.

Images from serial sections are shown for both immunohistochemical stains.

scale bars = 200  $\mu\text{m}$  (**a, c**); 20  $\mu\text{m}$  (**b, d**)

anti-CD68

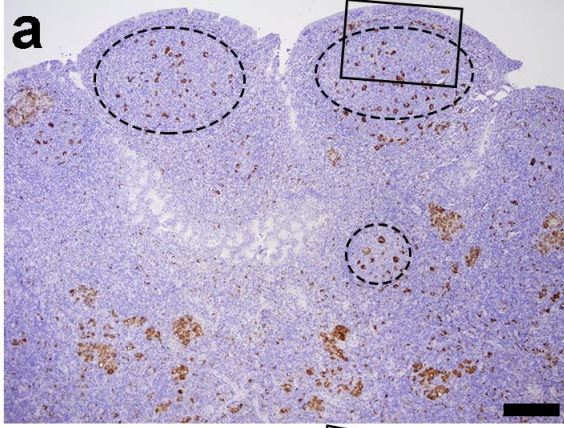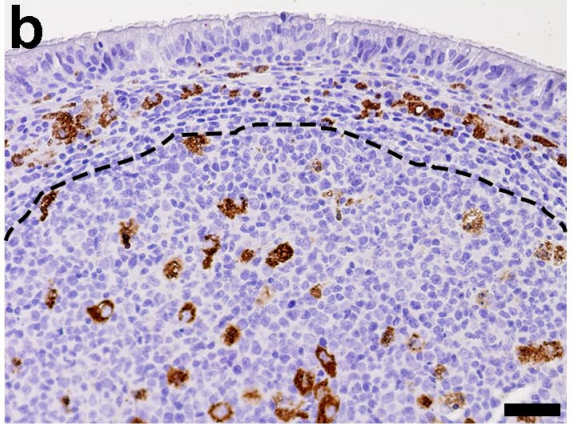

anti-CD63

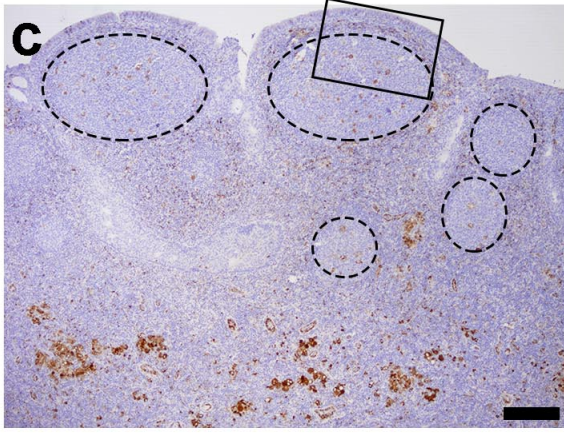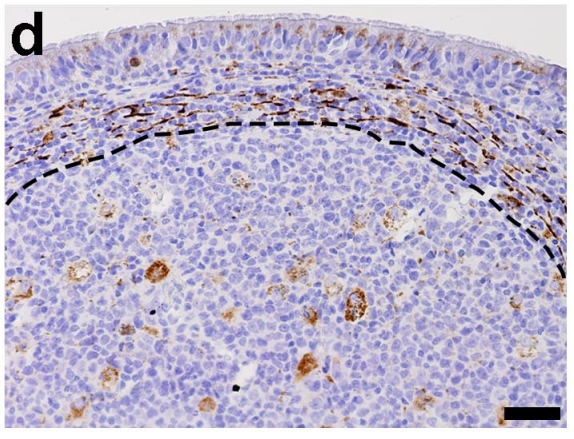

**Fig. S7**

**Distribution of CD63+ and CD68+ lysosomes in adenotonsillar tissue of a patient with infantile neurovisceral variant of ASM deficiency.**

Tissue sections were triple-stained with anti-CD63, anti-CD68, and anti-LAMP2 primary antibodies and detected by fluorescently labeled species-specific secondary antibodies (*Tab. S1*).

**(a)** Germinal center (GC, outlined by dotted line) and paracortex. Region of interest #1 (ROI #1) shows part of GC and paracortex in detail.

GC macrophages (empty arrows) as well as macrophages of the paracortex (empty arrowheads) contain CD68+/CD63+ lysosomes (LAMP2+). Similar to adenotonsillar tissues of MPS patients, a population of paracortical cells (two highlighted by white arrows) contains excess of CD63+/LAMP2+ lysosomes. The storage pathology in these cells is morphologically less pronounced than in MPS patients.

**(b)** Storage-laden macrophages cluster in lymphoid sinus areas of the adenotonsillar tissues. Lysosomes in these cells are CD63+/CD68+/LAMP2+.

Compare to Figures 1, 2, and S5.

scale bars = 20  $\mu$ m



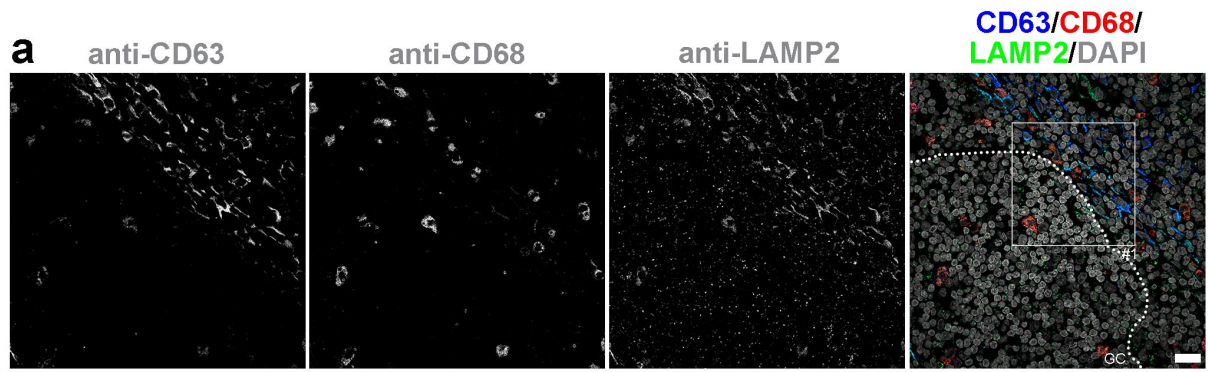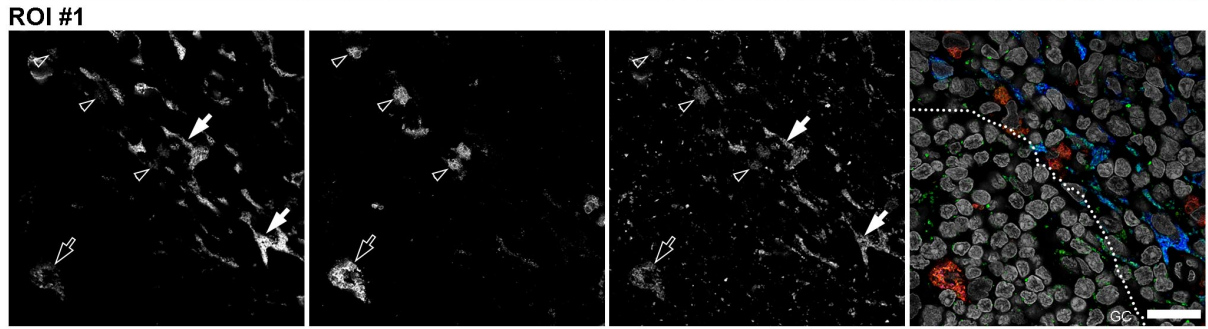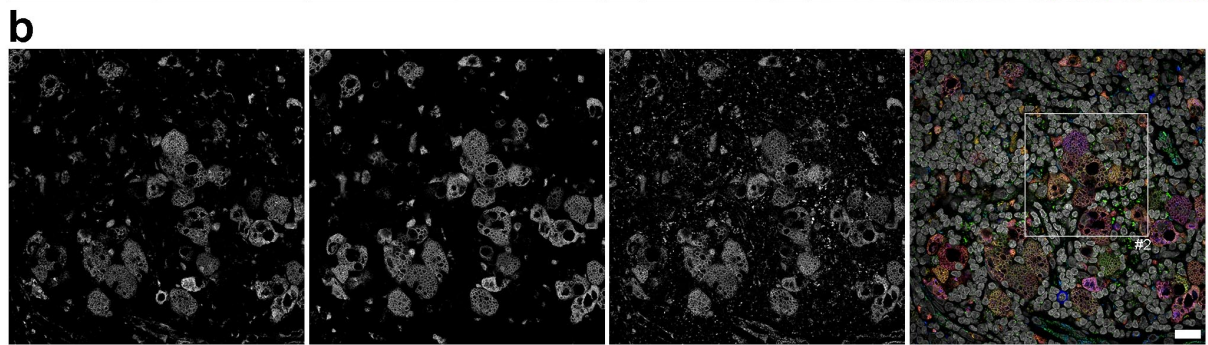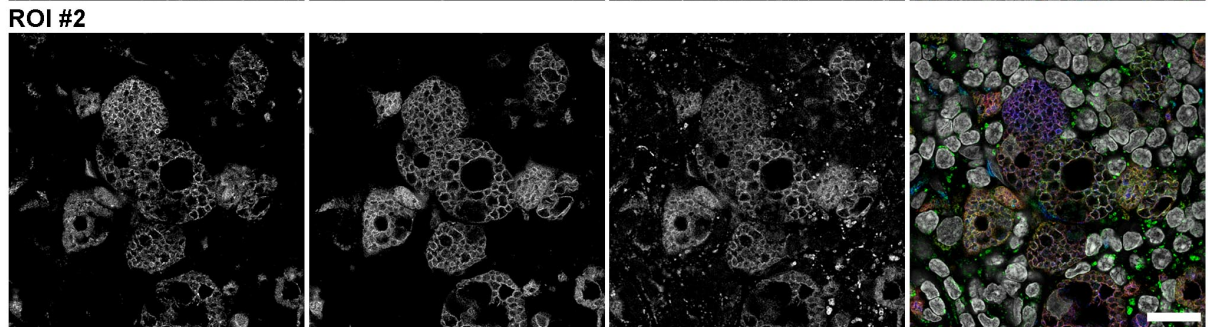

Supplement: 428_2023_3662_MOESM1_ESM.pdf [file 428_2023_3662_MOESM1_ESM.pdf]
